# Supplementary material for: Kinetics of chain reaction driven by proton-coupled electron transfer: α-hydroxyethyl radical and bromoacetate in buffered aqueous solutions
Source: Royal Society of Chemistry journal article supplement (doi:10.1039/d1cp00539a), 2021-01-01
Supplement: d1cp00539a1.pdf [file d1cp00539a1.pdf]

## Electronic Supplementary Information

### Kinetics of Chain Reaction Driven by Proton-Coupled Electron Transfer: $\alpha$ -Hydroxyethyl Radical and Bromoacetate in Buffered Aqueous Solutions

*Igor Sviben, Iva Džeba, Marija Bonifačić, and Ivan Ljubić*

Cartesian coordinates (Å), harmonic vibrational frequencies ( $\text{cm}^{-1}$ ), and final electronic energies (a.u.) of all the stationary points discussed in the paper. The PCM-M06-2X-D3/6-311+G(2d,p) level of theory is used.

#### (1) •EtOH

|           |           |           |           |
|-----------|-----------|-----------|-----------|
| H         | -1.305175 | -0.992398 | -0.693189 |
| H         | 1.979329  | 0.170388  | 0.038554  |
| C         | -1.225643 | -0.163111 | 0.014179  |
| O         | 1.163426  | -0.340321 | 0.015967  |
| H         | -1.387230 | -0.574934 | 1.019511  |
| C         | 0.091413  | 0.505538  | -0.105181 |
| H         | -2.028501 | 0.544080  | -0.191267 |
| H         | 0.239550  | 1.520873  | 0.244670  |
|           |           |           |           |
| 192.3080  | 344.4690  | 415.5523  |           |
| 588.8889  | 938.3350  | 1022.7212 |           |
| 1067.9020 | 1217.7023 | 1280.9191 |           |
| 1390.2752 | 1455.1216 | 1462.2450 |           |
| 1484.0047 | 3002.7873 | 3081.8942 |           |
| 3144.0629 | 3178.3141 | 3883.4188 |           |

E = -154.362934925 a.u.

#### (2) •EtOH/HCO<sub>3</sub><sup>-</sup>

|   |           |           |           |
|---|-----------|-----------|-----------|
| H | -3.450931 | 1.005164  | -0.781387 |
| H | -3.984000 | -0.473047 | 0.017623  |
| C | -3.355099 | 0.413084  | 0.140282  |
| H | -3.757212 | 1.007896  | 0.960608  |
| C | -1.945410 | 0.028732  | 0.412570  |
| O | -1.385055 | -0.814101 | -0.489852 |
| H | -1.267840 | 0.730111  | 0.892009  |
| H | -0.402041 | -0.886285 | -0.298317 |
| O | 1.178492  | 1.094267  | -0.392958 |
| O | 1.126948  | -1.061968 | 0.086908  |
| C | 1.848759  | -0.038398 | 0.033293  |
| H | 1.825005  | 1.809980  | -0.391915 |
| O | 3.048055  | 0.080012  | 0.306466  |

|           |           |           |
|-----------|-----------|-----------|
| 30.6532   | 50.1479   | 60.5322   |
| 104.8405  | 123.6838  | 200.7508  |
| 204.4911  | 442.5625  | 516.1273  |
| 583.1604  | 600.3738  | 681.6361  |
| 839.4967  | 938.5112  | 984.6939  |
| 1000.7644 | 1023.7308 | 1111.6461 |
| 1227.5645 | 1246.5062 | 1363.9788 |
| 1381.1835 | 1412.2329 | 1458.1172 |
| 1484.7445 | 1535.7212 | 1701.7178 |
| 2954.3472 | 2986.9261 | 3069.7346 |
| 3130.4513 | 3149.6648 | 3866.7260 |

E = -418.938458575 a.u.

**(3) •EtOH/HPO<sub>4</sub><sup>2-</sup>**

|   |           |           |           |
|---|-----------|-----------|-----------|
| H | 4.227889  | -0.009155 | -0.718274 |
| H | 3.975136  | -0.119410 | 1.022576  |
| C | 3.612964  | -0.486438 | 0.058296  |
| H | 3.792089  | -1.560919 | 0.010226  |
| C | 2.165859  | -0.183007 | -0.115828 |
| O | 1.800831  | 1.104061  | 0.031805  |
| H | 1.568722  | -0.773805 | -0.810679 |
| O | -1.278272 | -1.188985 | -1.070341 |
| O | -0.602894 | 1.201078  | -0.517027 |
| H | 0.773925  | 1.180726  | -0.213023 |
| P | -1.403591 | -0.050051 | -0.078689 |
| H | 0.287262  | -0.731982 | 1.122959  |
| O | -0.644425 | -0.548506 | 1.316895  |
| O | -2.805753 | 0.280101  | 0.377634  |

|           |           |           |
|-----------|-----------|-----------|
| 59.3882   | 71.3191   | 91.5605   |
| 124.9742  | 153.0368  | 216.8145  |
| 246.6276  | 345.8615  | 369.5551  |
| 442.4747  | 464.1065  | 501.8782  |
| 513.1373  | 553.3224  | 648.3546  |
| 743.4552  | 938.2538  | 943.8073  |
| 1023.3270 | 1054.6621 | 1102.7288 |
| 1116.6625 | 1165.9267 | 1193.2832 |
| 1261.7166 | 1381.4102 | 1427.0363 |
| 1459.9316 | 1484.6610 | 1614.3569 |
| 2096.0768 | 2986.2609 | 3068.1013 |
| 3105.8151 | 3133.6840 | 3750.4871 |

E = -797.644940773 a.u.

**(4) •EtOH/HCO<sub>3</sub><sup>-</sup> + 1 × H<sub>2</sub>O**

|   |          |           |           |
|---|----------|-----------|-----------|
| H | 2.853913 | -1.267071 | -1.269713 |
| H | 0.662799 | 0.611928  | -0.576481 |
| C | 2.268820 | -1.351761 | -0.343877 |
| O | 1.510788 | 0.975060  | -0.192743 |
| H | 2.738833 | -2.110074 | 0.282176  |
| C | 2.203965 | -0.048349 | 0.378183  |

|   |           |           |           |
|---|-----------|-----------|-----------|
| H | 1.271657  | -1.702626 | -0.622882 |
| H | 3.054151  | 0.290325  | 0.957826  |
| O | -0.802237 | -0.991654 | 1.118244  |
| H | 0.049379  | -0.530322 | 1.147646  |
| C | -1.445455 | -0.703321 | -0.066193 |
| O | -2.529025 | -1.254536 | -0.230544 |
| O | -0.853202 | 0.097676  | -0.851633 |
| H | -1.050172 | 1.920641  | -0.234798 |
| O | -0.809793 | 2.768906  | 0.172223  |
| H | 0.123205  | 2.644167  | 0.383170  |

|           |           |           |
|-----------|-----------|-----------|
| 23.5075   | 45.2340   | 53.4258   |
| 84.6833   | 109.1358  | 133.2258  |
| 135.4737  | 175.2974  | 206.9362  |
| 224.0512  | 283.3340  | 335.6747  |
| 446.6703  | 540.8139  | 561.4429  |
| 614.9451  | 635.6779  | 685.5137  |
| 843.9482  | 887.0211  | 929.1738  |
| 1000.1713 | 1033.6328 | 1112.9878 |
| 1233.3426 | 1261.7278 | 1340.5171 |
| 1375.7354 | 1412.6137 | 1459.4567 |
| 1483.2083 | 1536.3733 | 1671.1999 |
| 1725.9072 | 3001.5331 | 3061.6617 |
| 3083.2386 | 3139.7198 | 3193.4709 |
| 3726.7759 | 3771.9511 | 3874.5286 |

E = -495.377452128 a.u.

**(5) •EtOH/HCO<sub>3</sub><sup>-</sup> + 2 × H<sub>2</sub>O**

|   |           |           |           |
|---|-----------|-----------|-----------|
| H | 2.597610  | -1.074753 | -2.140893 |
| H | 0.779220  | 0.716536  | -0.584473 |
| C | 2.348449  | -1.224143 | -1.081831 |
| O | 1.697761  | 1.073905  | -0.526509 |
| H | 2.986973  | -2.018249 | -0.695091 |
| C | 2.544556  | 0.029154  | -0.298719 |
| H | 1.309761  | -1.562019 | -1.037258 |
| H | 3.544226  | 0.352749  | -0.036476 |
| O | 0.155423  | -1.183059 | 1.477837  |
| H | 0.917236  | -0.642216 | 1.216927  |
| C | -0.925979 | -0.861121 | 0.698678  |
| O | -1.946677 | -1.509821 | 0.887130  |
| O | -0.754577 | 0.085935  | -0.137931 |
| H | -0.565882 | 1.754222  | 0.856803  |
| O | -0.142696 | 2.523440  | 1.270131  |
| H | 0.766270  | 2.457163  | 0.953596  |
| H | -2.636033 | 1.074972  | -2.427332 |
| O | -2.925192 | 0.386870  | -1.821702 |
| H | -2.173865 | 0.260093  | -1.206226 |

|          |          |          |
|----------|----------|----------|
| 19.3697  | 25.9637  | 38.2339  |
| 53.6502  | 61.8188  | 87.7226  |
| 90.9552  | 114.6234 | 120.8794 |
| 141.9886 | 161.8108 | 186.3300 |
| 212.4415 | 219.7083 | 287.3210 |

|           |           |           |
|-----------|-----------|-----------|
| 322.5066  | 401.4831  | 442.5088  |
| 535.2562  | 579.6366  | 620.8034  |
| 641.6353  | 682.5756  | 689.6085  |
| 795.2880  | 844.3925  | 927.8614  |
| 1014.9247 | 1034.7992 | 1108.0134 |
| 1225.9023 | 1260.4510 | 1345.2508 |
| 1373.1449 | 1409.1091 | 1460.1286 |
| 1483.1157 | 1505.8564 | 1648.5201 |
| 1667.6371 | 1733.5516 | 3005.4510 |
| 3085.3854 | 3139.8597 | 3193.3475 |
| 3342.8828 | 3521.8307 | 3737.9275 |
| 3752.5127 | 3873.2750 | 3920.2384 |

E = -571.817849941 a.u.

**(6) •EtOH/HPO<sub>4</sub><sup>2-</sup> + 2 × H<sub>2</sub>O**

|   |           |           |           |
|---|-----------|-----------|-----------|
| H | 3.752726  | -1.224700 | -1.022039 |
| H | 4.327305  | 0.283947  | -0.312860 |
| C | 3.609483  | -0.530127 | -0.181965 |
| H | 3.857075  | -1.063620 | 0.735987  |
| C | 2.217374  | -0.009007 | -0.127765 |
| O | 1.842053  | 0.774488  | -1.165916 |
| H | 1.427972  | -0.610455 | 0.319510  |
| O | -1.051252 | -1.187780 | -1.007340 |
| O | -0.601782 | 1.302889  | -0.703755 |
| H | 0.844477  | 0.956809  | -1.070082 |
| P | -1.500379 | 0.096958  | -0.327546 |
| H | -0.619158 | 0.560083  | 1.630543  |
| O | -1.180570 | -0.149934 | 1.283478  |
| O | -2.971794 | 0.399712  | -0.439039 |
| H | 0.152983  | 2.027306  | 0.669319  |
| O | 0.596731  | 2.146243  | 1.543306  |
| H | 1.432797  | 1.672781  | 1.427896  |
| H | -0.370210 | -2.264258 | 0.089313  |
| O | -0.019780 | -2.824929 | 0.829486  |
| H | -0.170257 | -2.242953 | 1.582231  |

|           |           |           |
|-----------|-----------|-----------|
| 16.8516   | 52.5331   | 58.7566   |
| 81.2894   | 89.0806   | 109.7017  |
| 121.0869  | 129.3479  | 155.3582  |
| 183.4043  | 208.5827  | 214.6010  |
| 239.9056  | 296.7559  | 332.1479  |
| 370.0027  | 393.8141  | 420.7531  |
| 436.7269  | 452.0025  | 506.4852  |
| 529.1137  | 543.3312  | 553.7467  |
| 674.3012  | 750.5138  | 830.4614  |
| 837.9311  | 939.7129  | 945.3138  |
| 1027.4548 | 1045.2523 | 1097.0645 |
| 1113.9786 | 1152.4184 | 1217.0514 |
| 1251.9235 | 1381.5027 | 1419.9545 |
| 1459.9236 | 1484.4131 | 1557.2849 |
| 1676.2910 | 1700.1274 | 2700.6593 |
| 2989.3411 | 3073.7856 | 3130.1608 |
| 3145.0887 | 3230.2942 | 3347.3088 |

3742.1427

3801.2679

3892.3284

E = -950.537377055 a.u.

**(7) •EtOH/HPO<sub>4</sub><sup>2-</sup> + 2 × H<sub>2</sub>O (for TS with 3 × H<sub>2</sub>O)**

|   |           |           |           |
|---|-----------|-----------|-----------|
| H | -4.344380 | 1.317776  | -0.039801 |
| H | -3.330045 | 2.759064  | 0.005215  |
| C | -3.443489 | 1.779805  | -0.467020 |
| H | -3.617831 | 1.928259  | -1.532596 |
| C | -2.234793 | 0.943514  | -0.243626 |
| O | -1.847848 | 0.788698  | 1.041683  |
| H | -2.011598 | 0.114051  | -0.914507 |
| O | 0.723170  | -1.280923 | -1.539068 |
| O | 0.032513  | -0.875126 | 0.872926  |
| H | -1.057966 | 0.133854  | 1.049183  |
| P | 1.059989  | -0.578383 | -0.248662 |
| H | 0.003279  | 1.281947  | -0.725989 |
| O | 0.919961  | 1.054431  | -0.508411 |
| O | 2.493797  | -0.717182 | 0.230248  |
| H | 3.239835  | 0.779676  | 0.446406  |
| O | 3.583996  | 1.705395  | 0.528298  |
| H | 2.834807  | 2.214433  | 0.201518  |
| H | -2.793613 | -1.824819 | 0.516188  |
| O | -2.091861 | -2.477351 | 0.431060  |
| H | -1.262446 | -1.951937 | 0.534288  |

|           |           |           |
|-----------|-----------|-----------|
| 26.3100   | 44.4041   | 52.9271   |
| 63.6617   | 88.7640   | 98.5675   |
| 109.1845  | 129.2299  | 152.2478  |
| 157.3315  | 190.8362  | 212.6852  |
| 214.0541  | 237.6308  | 274.9271  |
| 345.0766  | 387.6400  | 427.4523  |
| 437.3627  | 447.9928  | 458.7245  |
| 506.3314  | 523.2608  | 546.8808  |
| 636.3498  | 756.1444  | 786.8055  |
| 787.8332  | 941.6081  | 950.8386  |
| 1023.1183 | 1051.4460 | 1104.6197 |
| 1110.5344 | 1137.9235 | 1169.8591 |
| 1252.5157 | 1381.8912 | 1421.7140 |
| 1458.8715 | 1484.5010 | 1560.3672 |
| 1675.2798 | 1693.6123 | 2579.0969 |
| 2995.2176 | 3076.4342 | 3117.4394 |
| 3140.1145 | 3254.8471 | 3342.1330 |
| 3749.9278 | 3896.7473 | 3905.5635 |

E = -950.535226842 a.u.

**(8) BrAc<sup>-</sup>**

|    |           |           |           |
|----|-----------|-----------|-----------|
| O  | 1.478945  | 1.330754  | 0.000001  |
| H  | 0.436873  | -1.471283 | 0.886034  |
| C  | 1.638875  | 0.100667  | 0.000000  |
| C  | 0.420058  | -0.844458 | 0.000003  |
| Br | -1.335588 | 0.032027  | -0.000001 |

|   |           |           |           |
|---|-----------|-----------|-----------|
| O | 2.710833  | -0.545210 | -0.000002 |
| H | 0.436873  | -1.471289 | -0.886024 |
|   | 56.4952   | 196.4473  | 366.0822  |
|   | 565.9325  | 660.9911  | 690.1656  |
|   | 918.5137  | 924.3608  | 1167.9788 |
|   | 1236.0269 | 1406.1678 | 1432.8868 |
|   | 1663.4347 | 3137.0427 | 3204.5066 |

E = -2802.18521788 a.u.

**(9) BrAc<sup>-</sup> + 1 × H<sub>2</sub>O**

|    |           |           |           |
|----|-----------|-----------|-----------|
| O  | -1.121895 | -0.905330 | 0.000002  |
| H  | 0.475072  | 1.620905  | 0.885920  |
| C  | -1.013974 | 0.328676  | 0.000001  |
| C  | 0.367286  | 1.002931  | 0.000000  |
| Br | 1.897162  | -0.216879 | 0.000000  |
| O  | -1.937789 | 1.183858  | 0.000000  |
| H  | 0.475071  | 1.620905  | -0.885920 |
| H  | -3.368812 | -1.301536 | -0.000002 |
| O  | -4.024954 | -0.593664 | -0.000001 |
| H  | -3.424784 | 0.181940  | -0.000002 |
|    | 23.9663   | 47.9524   | 52.7174   |
|    | 176.0199  | 188.3056  | 304.3710  |
|    | 313.9879  | 386.7984  | 567.9933  |
|    | 667.8875  | 700.7636  | 727.9418  |
|    | 924.6265  | 931.1647  | 1175.1676 |
|    | 1239.7152 | 1410.1018 | 1436.1119 |
|    | 1651.2718 | 1686.2081 | 3139.3603 |
|    | 3205.6591 | 3502.2153 | 3864.1766 |

E = -2878.62825376 a.u.

**(10) TS PCET (•EtOH + BrAc<sup>-</sup>)**

|    |           |           |           |
|----|-----------|-----------|-----------|
| H  | 2.476340  | -2.388424 | -0.241427 |
| H  | 1.950985  | 0.918617  | -1.107899 |
| C  | 2.903078  | -1.708127 | 0.497692  |
| O  | 2.628244  | 0.122015  | -1.027513 |
| H  | 3.994260  | -1.800066 | 0.443635  |
| C  | 2.497635  | -0.311699 | 0.210166  |
| H  | 2.587740  | -2.005876 | 1.496502  |
| H  | 2.512767  | 0.428174  | 1.009162  |
| O  | -0.080368 | 1.841343  | 1.250526  |
| H  | 0.112905  | -0.797895 | 1.182781  |
| C  | 0.275371  | 1.225525  | 0.242024  |
| C  | 0.132892  | -0.281254 | 0.234812  |
| Br | -2.159172 | -0.476973 | -0.129861 |
| O  | 0.791433  | 1.741035  | -0.809423 |
| H  | 0.367690  | -0.842278 | -0.654480 |

|           |           |           |
|-----------|-----------|-----------|
| -371.0901 | 71.9754   | 93.7186   |
| 97.5269   | 130.1356  | 142.3990  |
| 164.9963  | 218.8661  | 280.9736  |
| 358.8308  | 439.3821  | 471.5472  |
| 663.9625  | 761.2495  | 808.7038  |
| 912.9579  | 931.7898  | 951.8574  |
| 997.4183  | 1003.9582 | 1040.2688 |
| 1065.9991 | 1125.0221 | 1214.4024 |
| 1339.0028 | 1390.0373 | 1430.3734 |
| 1446.5880 | 1460.1179 | 1488.2109 |
| 1507.0556 | 1682.2492 | 2320.8090 |
| 3032.8973 | 3105.5795 | 3129.0415 |
| 3160.0490 | 3201.0098 | 3322.4208 |

E = -2956.54687507 a.u.

**(11) TS PCET ( $\bullet$ EtOH/HCO<sub>3</sub><sup>-</sup> + BrAc<sup>-</sup>)**

|    |           |           |           |
|----|-----------|-----------|-----------|
| H  | 2.442845  | 1.504313  | 2.509182  |
| H  | 2.364706  | 1.038671  | -0.346384 |
| C  | 1.537273  | 1.062966  | 2.075036  |
| O  | 1.821577  | 1.925675  | -0.186458 |
| H  | 0.765533  | 1.043814  | 2.844072  |
| C  | 1.085684  | 1.869428  | 0.901832  |
| H  | 1.776050  | 0.036232  | 1.789123  |
| H  | 0.484193  | 2.756879  | 1.075088  |
| O  | 1.447302  | -1.536729 | -0.392095 |
| H  | 0.947444  | -0.806614 | -0.884199 |
| C  | 2.767230  | -1.278840 | -0.255262 |
| O  | 3.477686  | -2.193743 | 0.172324  |
| O  | 3.173694  | -0.109469 | -0.567661 |
| O  | -1.325179 | 1.940211  | -1.413605 |
| H  | -1.391170 | 1.274159  | 1.110603  |
| Br | -2.796270 | -0.763778 | 0.300398  |
| C  | -0.957795 | 0.540585  | 0.448866  |
| C  | -0.749265 | 0.920741  | -1.000257 |
| H  | -0.330056 | -0.223641 | 0.878867  |
| O  | -0.006189 | 0.151445  | -1.676454 |

|           |           |           |
|-----------|-----------|-----------|
| -396.7541 | 34.1643   | 61.1475   |
| 78.1837   | 92.0476   | 103.9329  |
| 131.9025  | 141.6012  | 144.7893  |
| 154.8349  | 167.4152  | 200.6393  |
| 211.8465  | 230.3427  | 299.7782  |
| 338.3516  | 465.1817  | 492.8396  |
| 647.4233  | 675.7523  | 700.1683  |
| 748.3604  | 790.1819  | 852.3958  |
| 924.8850  | 939.9922  | 955.5202  |
| 1026.9375 | 1035.4851 | 1051.3817 |
| 1063.9886 | 1097.2613 | 1118.2450 |
| 1153.2645 | 1275.6842 | 1311.9037 |
| 1370.4838 | 1383.3072 | 1394.6497 |
| 1435.7433 | 1462.9129 | 1471.1695 |
| 1491.2591 | 1580.0006 | 1640.9821 |
| 1656.4216 | 2192.6081 | 2833.0706 |

|           |           |           |
|-----------|-----------|-----------|
| 3022.4755 | 3100.2486 | 3146.2885 |
| 3167.9580 | 3201.4280 | 3318.9336 |

E = -3221.12828918 a.u.

**(12) TS PCET ( $\bullet$ EtOH/HPO<sub>4</sub><sup>2-</sup> + BrAc<sup>-</sup>)**

|    |           |           |           |
|----|-----------|-----------|-----------|
| O  | 2.092395  | 1.768853  | 1.277305  |
| H  | 1.736953  | 0.956387  | -1.129096 |
| C  | 1.273773  | 0.868641  | 1.013147  |
| C  | 1.276816  | 0.305033  | -0.398125 |
| Br | 2.588463  | -1.306461 | -0.356624 |
| O  | 0.466721  | 0.335605  | 1.828285  |
| H  | 0.352956  | -0.159651 | -0.723182 |
| H  | -0.308328 | 4.426790  | -1.273385 |
| H  | 0.762785  | 3.764401  | -0.031927 |
| C  | 0.243509  | 3.524412  | -0.966537 |
| H  | 0.999020  | 3.321407  | -1.729040 |
| C  | -0.662053 | 2.349301  | -0.778382 |
| O  | -1.608277 | 2.417923  | 0.124110  |
| H  | -0.788692 | 1.642532  | -1.602438 |
| O  | -1.591753 | -0.924604 | -1.384684 |
| O  | -2.973915 | 0.388853  | 0.301176  |
| H  | -2.334040 | 1.250288  | 0.189527  |
| P  | -2.372897 | -1.026386 | -0.098145 |
| H  | -0.655857 | -0.702312 | 1.291954  |
| O  | -1.355230 | -1.395787 | 1.106659  |
| O  | -3.474920 | -2.048625 | -0.035226 |

|           |           |           |
|-----------|-----------|-----------|
| -314.4043 | 31.1969   | 43.7805   |
| 60.4873   | 71.5599   | 82.3308   |
| 103.4254  | 107.9572  | 126.0172  |
| 145.1341  | 161.2969  | 166.4610  |
| 178.3970  | 182.6370  | 240.6494  |
| 266.1793  | 364.1338  | 381.6708  |
| 470.2615  | 482.8540  | 504.7049  |
| 506.1399  | 523.7612  | 587.7429  |
| 665.9221  | 790.8030  | 837.0175  |
| 908.3982  | 920.1662  | 930.8435  |
| 946.1130  | 957.8872  | 1005.1883 |
| 1063.4268 | 1096.5474 | 1114.4666 |
| 1163.8163 | 1178.4357 | 1186.3284 |
| 1242.2694 | 1292.4627 | 1369.2629 |
| 1380.1250 | 1421.2507 | 1452.4914 |
| 1464.7451 | 1486.2601 | 1492.9312 |
| 1626.9165 | 1847.8551 | 2958.3819 |
| 2992.0882 | 3040.1985 | 3069.0275 |
| 3107.9722 | 3143.9120 | 3252.0991 |

E = -3599.83659128 a.u.



**(13) TS PCET ( $\bullet\text{EtOH}/\text{HCO}_3^- + \text{BrAc}^-$ ) 1  $\times$  H<sub>2</sub>O**

|    |           |           |           |
|----|-----------|-----------|-----------|
| H  | -2.501472 | 2.557729  | -1.785067 |
| H  | -2.420569 | 1.047080  | 0.646217  |
| C  | -1.586761 | 1.990403  | -1.573987 |
| O  | -1.840440 | 1.897241  | 0.847607  |
| H  | -0.827950 | 2.284634  | -2.298256 |
| C  | -1.119334 | 2.273590  | -0.184759 |
| H  | -1.815993 | 0.931601  | -1.712617 |
| H  | -0.514115 | 3.155863  | -0.000843 |
| O  | -1.558541 | -1.326647 | -0.317774 |
| H  | -1.058476 | -0.813515 | 0.380171  |
| C  | -2.893334 | -1.056449 | -0.304883 |
| O  | -3.612840 | -1.780333 | -0.993315 |
| O  | -3.274654 | -0.073768 | 0.408762  |
| O  | 1.285847  | 1.498472  | 1.951003  |
| H  | 1.357656  | 1.860524  | -0.638273 |
| Br | 2.828820  | -0.290341 | -0.658041 |
| C  | 0.948431  | 0.918200  | -0.309480 |
| C  | 0.747136  | 0.702834  | 1.170574  |
| H  | 0.338815  | 0.358886  | -1.002016 |
| O  | 0.034846  | -0.299967 | 1.494030  |
| H  | -0.315955 | -3.024311 | 0.371569  |
| O  | 0.423629  | -3.047280 | 0.990587  |
| H  | 0.509767  | -2.109787 | 1.238554  |

|           |           |           |
|-----------|-----------|-----------|
| -390.3492 | 25.4598   | 50.6900   |
| 63.5492   | 69.9072   | 83.0447   |
| 95.2302   | 108.6889  | 132.6648  |
| 137.7561  | 143.7229  | 151.3464  |
| 162.8862  | 180.8073  | 197.3079  |
| 225.3331  | 236.5625  | 291.8737  |
| 295.3472  | 345.7891  | 350.7266  |
| 456.9345  | 493.3174  | 571.4500  |
| 646.9436  | 672.7547  | 699.2679  |
| 758.1978  | 790.5584  | 847.7216  |
| 926.1540  | 937.6802  | 957.9024  |
| 1010.2835 | 1031.2763 | 1040.0168 |
| 1053.7678 | 1068.9707 | 1115.9709 |
| 1159.4743 | 1274.8955 | 1316.7203 |
| 1350.5898 | 1376.7162 | 1394.5197 |
| 1435.7571 | 1459.2089 | 1472.2433 |
| 1491.5743 | 1573.1271 | 1639.5577 |
| 1674.0204 | 1690.4206 | 2240.5503 |
| 3023.7884 | 3071.9999 | 3101.2690 |
| 3147.8068 | 3172.2500 | 3200.3186 |
| 3317.6477 | 3681.1176 | 3870.4574 |

E = -3297.56966255 a.u.

**(14) TS PCET ( $\bullet\text{EtOH}/\text{HCO}_3^- + \text{BrAc}^-$ ) 2  $\times$  H<sub>2</sub>O**

|   |           |          |           |
|---|-----------|----------|-----------|
| H | -1.954430 | 3.109359 | -1.667283 |
| H | -2.230204 | 1.145894 | 0.395692  |
| C | -1.104402 | 2.440779 | -1.486092 |

|    |           |           |           |
|----|-----------|-----------|-----------|
| O  | -1.646573 | 1.884554  | 0.821621  |
| H  | -0.250957 | 2.811594  | -2.052168 |
| C  | -0.790447 | 2.408274  | -0.028223 |
| H  | -1.375016 | 1.451376  | -1.861119 |
| H  | -0.177934 | 3.194168  | 0.401199  |
| O  | -1.382324 | -1.065574 | -0.989694 |
| H  | -0.941332 | -0.748163 | -0.155394 |
| C  | -2.696190 | -0.709919 | -1.039358 |
| O  | -3.363480 | -1.169540 | -1.961110 |
| O  | -3.108874 | 0.078870  | -0.122058 |
| O  | 1.238594  | 1.074053  | 2.172238  |
| H  | 1.694080  | 1.944716  | -0.255210 |
| Br | 3.065377  | -0.262696 | -0.549277 |
| C  | 1.194699  | 0.991535  | -0.184367 |
| C  | 0.801148  | 0.488297  | 1.178755  |
| H  | 0.671273  | 0.618615  | -1.050656 |
| O  | 0.029926  | -0.530839 | 1.187285  |
| H  | -0.362213 | -2.991248 | -0.436746 |
| O  | 0.273935  | -3.186032 | 0.261635  |
| H  | 0.392583  | -2.317843 | 0.683479  |
| H  | -2.861969 | -0.689022 | 1.668219  |
| O  | -2.397894 | -0.989756 | 2.464537  |
| H  | -1.467381 | -0.814752 | 2.234761  |

|           |           |           |
|-----------|-----------|-----------|
| -366.5907 | 24.6783   | 35.9948   |
| 43.0228   | 55.1369   | 65.5706   |
| 76.8303   | 89.4601   | 101.5501  |
| 116.9927  | 125.8715  | 135.1410  |
| 143.4507  | 151.5557  | 173.0599  |
| 183.2828  | 189.5916  | 199.9611  |
| 230.1767  | 239.7877  | 273.6547  |
| 275.7738  | 327.4089  | 350.3715  |
| 400.9822  | 466.2412  | 483.1695  |
| 498.7507  | 546.6362  | 637.5502  |
| 644.6492  | 675.8357  | 694.1926  |
| 762.6940  | 788.8718  | 850.6513  |
| 927.4143  | 942.0486  | 960.4687  |
| 986.7058  | 1030.9148 | 1036.9156 |
| 1043.5599 | 1055.1965 | 1089.9619 |
| 1124.7114 | 1273.8728 | 1318.0263 |
| 1345.2912 | 1372.8168 | 1395.0739 |
| 1437.2567 | 1459.7649 | 1471.0226 |
| 1492.8850 | 1561.6771 | 1645.7735 |
| 1668.4567 | 1686.6632 | 1718.2649 |
| 2464.3410 | 3028.4078 | 3104.6008 |
| 3152.5783 | 3158.2835 | 3180.9514 |
| 3202.4321 | 3321.4050 | 3653.8099 |
| 3705.5697 | 3764.2553 | 3874.2575 |

E = -3374.01544372 a.u.

**(15) TS PCET ( $\bullet$ EtOH/HCO<sub>3</sub><sup>-</sup> + BrAc<sup>-</sup>) 3 × H<sub>2</sub>O**

|   |          |           |           |
|---|----------|-----------|-----------|
| H | 1.872647 | -2.952999 | -1.500371 |
| H | 1.895906 | -0.950276 | 0.535081  |

|    |           |           |           |
|----|-----------|-----------|-----------|
| C  | 0.969461  | -2.344771 | -1.372187 |
| O  | 1.363346  | -1.718673 | 0.947257  |
| H  | 0.172614  | -2.783947 | -1.970614 |
| C  | 0.586147  | -2.316033 | 0.068590  |
| H  | 1.186637  | -1.343899 | -1.751057 |
| H  | 0.021287  | -3.142639 | 0.485964  |
| O  | 0.948953  | 1.198555  | -0.956059 |
| H  | 0.497613  | 0.867533  | -0.126020 |
| C  | 2.276927  | 0.935124  | -0.959698 |
| O  | 2.950625  | 1.394293  | -1.873752 |
| O  | 2.716373  | 0.206660  | 0.004548  |
| O  | -1.588343 | -1.059884 | 2.173714  |
| H  | -1.905121 | -2.044002 | -0.236301 |
| Br | -3.427317 | 0.053030  | -0.628750 |
| C  | -1.466880 | -1.060432 | -0.181206 |
| C  | -1.160337 | -0.481688 | 1.173033  |
| H  | -0.958503 | -0.668983 | -1.048205 |
| O  | -0.462164 | 0.590433  | 1.167569  |
| H  | -0.244573 | 3.063602  | -0.481661 |
| O  | -0.920996 | 3.206630  | 0.190558  |
| H  | -0.976216 | 2.337631  | 0.622899  |
| H  | 2.368755  | 0.967075  | 1.798590  |
| O  | 1.848580  | 1.225794  | 2.573746  |
| H  | 0.945026  | 0.989515  | 2.295823  |
| H  | 5.550637  | -1.039806 | 0.382725  |
| O  | 5.375820  | -0.463047 | -0.366102 |
| H  | 4.439940  | -0.194112 | -0.263638 |

|           |           |           |
|-----------|-----------|-----------|
| -349.8203 | 18.5689   | 27.5273   |
| 38.6150   | 48.2272   | 52.3273   |
| 60.1893   | 62.3503   | 80.1784   |
| 92.2990   | 96.5351   | 103.7341  |
| 113.9989  | 125.2339  | 136.0106  |
| 138.9736  | 150.8415  | 170.6743  |
| 183.1709  | 185.8617  | 198.8597  |
| 206.6557  | 230.7117  | 240.5814  |
| 263.1875  | 273.4973  | 325.0055  |
| 354.8914  | 387.5568  | 401.4770  |
| 466.0623  | 469.7084  | 495.5308  |
| 551.3015  | 625.5635  | 651.9728  |
| 671.3393  | 678.8003  | 696.7003  |
| 777.0109  | 790.5288  | 849.3502  |
| 928.9950  | 943.5496  | 964.5366  |
| 1003.6502 | 1035.4283 | 1043.2489 |
| 1046.7212 | 1049.8307 | 1078.3915 |
| 1123.8741 | 1273.6132 | 1321.4059 |
| 1347.4311 | 1379.2025 | 1396.0218 |
| 1435.6599 | 1460.0202 | 1472.0427 |
| 1492.7798 | 1553.5346 | 1646.1338 |
| 1648.0374 | 1671.7896 | 1690.0078 |
| 1724.6856 | 2649.0963 | 3031.3816 |
| 3045.0271 | 3107.0912 | 3155.0097 |
| 3184.8861 | 3203.6928 | 3323.8866 |
| 3531.7522 | 3649.7113 | 3712.3192 |
| 3784.9952 | 3879.7291 | 3920.6107 |

E = -3450.45599668 a.u.

**(16) TS PCET ( $\bullet$ EtOH/HPO<sub>4</sub><sup>2-</sup> + BrAc<sup>-</sup>) 1 × H<sub>2</sub>O**

|    |           |           |           |
|----|-----------|-----------|-----------|
| O  | 1.846540  | 1.964101  | 1.150319  |
| H  | 1.938160  | 0.884840  | -1.199465 |
| C  | 1.177467  | 0.951973  | 0.879265  |
| C  | 1.385267  | 0.306467  | -0.474483 |
| Br | 2.896075  | -1.226126 | -0.075266 |
| O  | 0.347986  | 0.377214  | 1.645694  |
| H  | 0.596620  | -0.331719 | -0.852826 |
| H  | -0.138394 | 3.993217  | -2.020697 |
| H  | 0.998162  | 3.514206  | -0.749939 |
| C  | 0.459871  | 3.158054  | -1.633265 |
| H  | 1.185782  | 2.879526  | -2.397453 |
| C  | -0.406727 | 2.004601  | -1.274434 |
| O  | -1.323399 | 2.212807  | -0.349625 |
| H  | -0.586490 | 1.187288  | -1.967524 |
| O  | -1.429704 | -1.050284 | -1.733946 |
| O  | -2.762006 | 0.261039  | -0.017244 |
| H  | -1.938475 | 1.333170  | -0.226962 |
| P  | -2.243647 | -1.147516 | -0.459056 |
| H  | -0.631032 | -0.871368 | 1.017778  |
| O  | -1.234119 | -1.606319 | 0.745188  |
| O  | -3.351516 | -2.175005 | -0.456770 |
| H  | -2.556744 | 0.647856  | 1.739683  |
| O  | -2.220070 | 0.948256  | 2.608805  |
| H  | -1.260474 | 0.909114  | 2.455679  |

|           |           |           |
|-----------|-----------|-----------|
| -450.2250 | 37.2253   | 56.5296   |
| 72.8072   | 81.2737   | 87.0493   |
| 99.5759   | 110.4288  | 116.0896  |
| 127.1411  | 132.2094  | 144.6110  |
| 159.7251  | 177.5529  | 181.2553  |
| 195.0747  | 228.1316  | 265.2620  |
| 320.0838  | 374.5939  | 399.5577  |
| 452.1139  | 465.2340  | 474.5439  |
| 512.2884  | 523.4511  | 546.6898  |
| 571.8013  | 662.4254  | 720.9385  |
| 732.6892  | 789.9228  | 809.5431  |
| 866.1131  | 895.6812  | 938.9319  |
| 949.8081  | 960.6408  | 1022.1275 |
| 1040.6146 | 1068.4034 | 1113.8188 |
| 1124.1354 | 1148.0624 | 1217.8791 |
| 1251.2792 | 1286.4889 | 1372.8939 |
| 1382.5326 | 1440.8939 | 1465.8051 |
| 1471.3252 | 1486.1579 | 1623.3844 |
| 1635.2559 | 1703.2033 | 1826.2254 |
| 3004.6227 | 3074.9702 | 3132.2163 |
| 3155.5018 | 3165.4495 | 3272.3696 |
| 3287.2429 | 3541.7729 | 3703.8954 |

E = -3676.28533652 a.u.

(17) TS PCET ( $\bullet\text{EtOH}/\text{HPO}_4^{2-} + \text{BrAc}^-$ )  $2 \times \text{H}_2\text{O}$

|    |           |           |           |
|----|-----------|-----------|-----------|
| O  | 1.637561  | 2.272854  | 1.160575  |
| H  | 1.819714  | 1.227877  | -1.200568 |
| C  | 1.049021  | 1.217992  | 0.874469  |
| C  | 1.325856  | 0.595297  | -0.478151 |
| Br | 2.975679  | -0.767790 | -0.074790 |
| O  | 0.251026  | 0.579811  | 1.625873  |
| H  | 0.595443  | -0.107463 | -0.862287 |
| H  | -0.454863 | 4.191624  | -1.992253 |
| H  | 0.724533  | 3.771163  | -0.740336 |
| C  | 0.196530  | 3.390237  | -1.619737 |
| H  | 0.927434  | 3.161281  | -2.395476 |
| C  | -0.594969 | 2.184688  | -1.260850 |
| O  | -1.517919 | 2.336035  | -0.327471 |
| H  | -0.727902 | 1.357027  | -1.951604 |
| O  | -1.412594 | -0.916772 | -1.739021 |
| O  | -2.844502 | 0.287018  | -0.019876 |
| H  | -2.074824 | 1.432510  | -0.214096 |
| P  | -2.234922 | -1.072534 | -0.477703 |
| H  | -0.640056 | -0.684554 | 1.019148  |
| O  | -1.190881 | -1.465445 | 0.738906  |
| O  | -3.253466 | -2.185625 | -0.478451 |
| H  | -2.664097 | 0.680199  | 1.744669  |
| O  | -2.344513 | 0.999901  | 2.612759  |
| H  | -1.385502 | 1.029305  | 2.456590  |
| H  | 1.458015  | -2.840239 | -0.096576 |
| O  | 0.670963  | -3.388347 | 0.011442  |
| H  | -0.026867 | -2.742787 | 0.243722  |

|           |           |           |
|-----------|-----------|-----------|
| -433.7167 | 35.9353   | 39.9747   |
| 66.4167   | 75.7865   | 80.4343   |
| 89.7578   | 99.0363   | 110.6944  |
| 114.2451  | 119.4359  | 126.3431  |
| 132.4816  | 140.5396  | 154.6077  |
| 168.1733  | 169.7186  | 185.7893  |
| 213.4768  | 225.9786  | 262.4868  |
| 276.1388  | 309.9729  | 381.9001  |
| 385.5480  | 430.0006  | 453.3215  |
| 466.3339  | 469.9514  | 515.1557  |
| 523.1381  | 535.9214  | 560.2816  |
| 663.5610  | 674.0220  | 707.3626  |
| 741.1270  | 785.8631  | 792.3187  |
| 917.3483  | 926.3272  | 941.2477  |
| 954.9808  | 962.8853  | 1020.9610 |
| 1050.3947 | 1069.6878 | 1113.3549 |
| 1121.8428 | 1159.8338 | 1190.2963 |
| 1259.6699 | 1293.6987 | 1373.9673 |
| 1381.9779 | 1441.0279 | 1464.6294 |
| 1469.8336 | 1484.1184 | 1622.3761 |
| 1636.0590 | 1663.9306 | 1705.8913 |
| 1970.2869 | 3006.2603 | 3074.0293 |
| 3126.5056 | 3134.0521 | 3153.3511 |
| 3162.5400 | 3280.3417 | 3545.8151 |
| 3556.4611 | 3711.7364 | 3844.8596 |

E = -3752.72916800 a.u.

**(18) TS PCET ( $\bullet$ EtOH/HPO<sub>4</sub><sup>2-</sup> + BrAc<sup>-</sup>) 3 × H<sub>2</sub>O**

|    |           |           |           |
|----|-----------|-----------|-----------|
| O  | -1.577957 | -2.404997 | 1.253734  |
| H  | -1.681577 | -1.577679 | -1.199028 |
| C  | -1.152628 | -1.284359 | 0.933658  |
| C  | -1.366157 | -0.825911 | -0.491360 |
| Br | -3.298030 | 0.253044  | -0.360206 |
| O  | -0.566513 | -0.459943 | 1.700322  |
| H  | -0.753409 | -0.012824 | -0.862592 |
| H  | 1.175130  | -4.073232 | -1.503122 |
| H  | -0.223752 | -3.818196 | -0.447474 |
| C  | 0.339863  | -3.396084 | -1.284456 |
| H  | -0.304556 | -3.356717 | -2.162178 |
| C  | 0.840150  | -2.043721 | -0.930989 |
| O  | 1.633361  | -1.967994 | 0.125158  |
| H  | 0.927466  | -1.247051 | -1.663999 |
| O  | 1.116909  | 1.100516  | -1.565998 |
| O  | 2.574425  | 0.330772  | 0.362344  |
| H  | 1.981450  | -0.988060 | 0.235732  |
| P  | 1.757397  | 1.515597  | -0.260409 |
| H  | 0.117691  | 0.905012  | 1.105841  |
| O  | 0.552122  | 1.761298  | 0.829652  |
| O  | 2.544263  | 2.800409  | -0.274214 |
| H  | 2.289607  | 0.010733  | 2.155611  |
| O  | 1.922460  | -0.326926 | 2.994957  |
| H  | 1.011937  | -0.541839 | 2.730106  |
| H  | -2.193354 | 2.559720  | -0.384544 |
| O  | -1.539765 | 3.255693  | -0.241440 |
| H  | -0.767293 | 2.772148  | 0.112165  |
| H  | 3.891094  | -1.790088 | -1.313230 |
| O  | 4.326166  | -0.931886 | -1.300902 |
| H  | 3.748535  | -0.387525 | -0.719971 |

|           |           |           |
|-----------|-----------|-----------|
| -401.7258 | 32.6654   | 35.8443   |
| 41.5602   | 48.1410   | 74.1380   |
| 78.1094   | 90.4018   | 100.3261  |
| 109.7883  | 113.2084  | 115.5901  |
| 121.2155  | 133.4704  | 137.2763  |
| 144.6093  | 155.6882  | 156.3391  |
| 168.9316  | 178.6316  | 187.8759  |
| 193.3577  | 227.5273  | 241.6564  |
| 250.0264  | 277.3205  | 326.5079  |
| 377.5348  | 393.5420  | 418.7514  |
| 422.2909  | 461.2318  | 469.3944  |
| 474.5530  | 519.2162  | 526.6515  |
| 536.6379  | 558.3685  | 664.3707  |
| 667.9938  | 699.5871  | 728.0854  |
| 745.3358  | 788.6608  | 806.1152  |
| 907.6689  | 934.6534  | 946.1068  |
| 962.2563  | 973.0958  | 1027.2027 |
| 1057.5335 | 1066.5455 | 1110.4733 |
| 1122.0278 | 1166.1691 | 1185.2931 |
| 1266.4581 | 1310.5137 | 1374.0843 |

|           |           |           |
|-----------|-----------|-----------|
| 1383.7692 | 1443.1196 | 1465.7677 |
| 1472.5018 | 1486.7419 | 1600.4692 |
| 1635.3525 | 1661.3610 | 1676.6713 |
| 1707.6546 | 2251.4553 | 3013.5663 |
| 3060.5405 | 3080.0868 | 3141.6512 |
| 3156.1760 | 3176.1329 | 3285.4778 |
| 3424.7464 | 3574.7588 | 3613.8105 |
| 3708.6272 | 3838.3813 | 3905.8556 |

E = -3829.17229381 a.u.

**(19) TS PCET no H bond ( $\bullet\text{EtOH}/\text{HCO}_3^- + \text{BrAc}^-$ )**

|    |           |           |           |
|----|-----------|-----------|-----------|
| O  | 2.823384  | 1.291843  | -0.206259 |
| H  | 0.800193  | 0.217092  | -1.429348 |
| C  | 1.825149  | 0.902808  | 0.441401  |
| C  | 0.749589  | 0.182405  | -0.351997 |
| Br | 1.514222  | -1.988398 | -0.226928 |
| O  | 1.614783  | 1.040008  | 1.668266  |
| H  | -0.195702 | -0.044985 | 0.118620  |
| H  | -0.040230 | 4.357388  | -0.719819 |
| H  | 0.938128  | 3.444274  | 0.442416  |
| C  | 0.479253  | 3.406458  | -0.547784 |
| H  | 1.262941  | 3.294137  | -1.293798 |
| C  | -0.487490 | 2.283496  | -0.624801 |
| O  | -1.404522 | 2.217581  | 0.321864  |
| H  | -0.762101 | 1.872544  | -1.593649 |
| H  | -2.087596 | 1.476167  | 0.071476  |
| O  | -3.694639 | -1.661619 | -0.238560 |
| O  | -2.200467 | -0.889874 | 1.201378  |
| C  | -2.897892 | -0.642572 | 0.222029  |
| H  | -4.174540 | -1.321993 | -1.003539 |
| O  | -2.982354 | 0.440027  | -0.432057 |

|           |           |           |
|-----------|-----------|-----------|
| -369.4349 | 23.4296   | 35.2765   |
| 48.9625   | 70.5597   | 81.9072   |
| 105.2375  | 108.5367  | 125.2070  |
| 139.6484  | 145.7446  | 162.5207  |
| 195.3289  | 208.6218  | 259.4864  |
| 334.6326  | 448.8125  | 477.9807  |
| 517.2950  | 610.5572  | 656.3776  |
| 678.3777  | 776.1108  | 796.3141  |
| 839.4595  | 929.7906  | 947.3609  |
| 956.7293  | 1004.7982 | 1016.1093 |
| 1038.5726 | 1080.4112 | 1122.3097 |
| 1206.1795 | 1238.1520 | 1266.7573 |
| 1356.8549 | 1365.8219 | 1387.5883 |
| 1429.3502 | 1451.8576 | 1457.9637 |
| 1482.7566 | 1580.4779 | 1632.9919 |
| 1706.4647 | 2395.7963 | 3020.6713 |
| 3101.0580 | 3140.8545 | 3165.8614 |
| 3187.3050 | 3311.6991 | 3863.1169 |

E = -3221.11857729 a.u.

**(20) TS PCET no H bond ( $\bullet\text{EtOH}/\text{HPO}_4^{2-} + \text{BrAc}^-$ )**

|    |           |           |           |
|----|-----------|-----------|-----------|
| O  | 2.224571  | 0.757043  | -1.875473 |
| H  | 0.264112  | -0.063617 | -0.385188 |
| C  | 2.362820  | 0.668270  | -0.631943 |
| C  | 1.205404  | 0.044870  | 0.136990  |
| Br | 1.742882  | -2.016495 | 0.328940  |
| O  | 3.360626  | 1.014712  | 0.041432  |
| H  | 1.127556  | 0.321693  | 1.178903  |
| H  | 0.840547  | 4.487313  | 0.462669  |
| H  | 1.679407  | 3.231353  | 1.376975  |
| C  | 1.212589  | 3.452872  | 0.412285  |
| H  | 1.983299  | 3.401786  | -0.357165 |
| C  | 0.108979  | 2.488023  | 0.129632  |
| O  | -0.819030 | 2.307602  | 1.037199  |
| H  | -0.149751 | 2.291217  | -0.914552 |
| O  | -1.848884 | -0.756553 | -1.346109 |
| O  | -2.714220 | 1.188166  | 0.048026  |
| H  | -1.817784 | 1.678183  | 0.522852  |
| P  | -2.631610 | -0.376052 | -0.117086 |
| H  | -4.410664 | -0.602158 | -1.335666 |
| O  | -2.294368 | -1.053907 | 1.180164  |
| O  | -4.206470 | -0.763550 | -0.408640 |

|           |           |           |
|-----------|-----------|-----------|
| -573.0526 | 46.6630   | 60.7242   |
| 68.5249   | 76.3441   | 78.8557   |
| 87.7188   | 93.2952   | 116.2897  |
| 116.4300  | 147.2115  | 152.2950  |
| 156.8652  | 168.4766  | 183.7261  |
| 237.9476  | 287.0283  | 323.2914  |
| 380.3860  | 446.6621  | 460.2924  |
| 482.7919  | 517.4373  | 531.7386  |
| 637.0347  | 658.9405  | 769.7237  |
| 793.0099  | 887.9369  | 926.8707  |
| 944.3028  | 957.5734  | 983.7719  |
| 1013.4017 | 1044.8305 | 1068.9631 |
| 1117.2153 | 1124.6270 | 1167.2303 |
| 1205.5284 | 1306.0165 | 1372.9026 |
| 1388.9866 | 1414.7583 | 1432.9775 |
| 1450.8507 | 1462.2068 | 1470.5822 |
| 1531.0899 | 1621.5536 | 2973.3130 |
| 3061.8638 | 3066.8236 | 3133.3523 |
| 3169.4405 | 3277.0727 | 3885.8432 |

E = -3599.82499104 a.u.

**(21)  $\bullet\text{CH}_2\text{CO}_2\text{H}$**

|   |           |           |           |
|---|-----------|-----------|-----------|
| O | -0.853825 | -0.949662 | -0.000153 |
| H | 1.663260  | -1.312696 | 0.000229  |
| C | -0.015873 | 0.105232  | 0.000012  |
| C | 1.375196  | -0.273263 | 0.000137  |
| O | -0.418108 | 1.252281  | 0.000009  |



|   |           |           |           |
|---|-----------|-----------|-----------|
| H | 2.116709  | 0.509110  | -0.000635 |
| H | -1.760445 | -0.609177 | 0.000670  |
|   | 338.3436  | 438.0225  | 528.1537  |
|   | 591.8826  | 640.1443  | 769.7149  |
|   | 944.8668  | 1003.2593 | 1211.5923 |
|   | 1378.6162 | 1474.9697 | 1729.4571 |
|   | 3203.9084 | 3327.9363 | 3814.8720 |

E = -228.413655202 a.u.

**(22) •CH<sub>2</sub>CO<sub>2</sub><sup>-</sup>**

|   |           |           |           |
|---|-----------|-----------|-----------|
| O | 0.698137  | -1.123677 | 0.000002  |
| H | -1.899915 | -0.933323 | -0.000021 |
| C | 0.125816  | -0.000003 | -0.000011 |
| C | -1.354003 | -0.000075 | 0.000012  |
| O | 0.697988  | 1.123757  | 0.000002  |
| H | -1.899956 | 0.933149  | -0.000022 |
|   | 215.3887  | 456.4259  | 570.9963  |
|   | 658.6404  | 772.8776  | 974.6505  |
|   | 995.0257  | 1367.4629 | 1468.5006 |
|   | 1577.2997 | 3166.8537 | 3280.6355 |

E = -227.947039772 a.u.

**(23) •CH<sub>2</sub>CO<sub>2</sub><sup>-</sup>/H<sub>2</sub>CO<sub>3</sub>**

|   |           |           |           |
|---|-----------|-----------|-----------|
| O | -1.221336 | 1.107841  | -0.140752 |
| H | -3.812522 | 0.929030  | -0.119075 |
| C | -1.816962 | 0.000000  | -0.000001 |
| C | -3.276109 | -0.000004 | -0.000011 |
| O | -1.221330 | -1.107835 | 0.140759  |
| H | -3.812520 | -0.929040 | 0.119039  |
| O | 1.264924  | -1.119936 | -0.148665 |
| O | 3.164893  | 0.000006  | -0.000021 |
| C | 1.948404  | -0.000000 | -0.000001 |
| H | 0.238247  | -1.039062 | -0.025024 |
| O | 1.264918  | 1.119929  | 0.148690  |
| H | 0.238241  | 1.039057  | 0.025043  |
|   | 31.5039   | 62.8485   | 118.1601  |
|   | 163.2821  | 189.7324  | 275.4269  |
|   | 281.5317  | 482.3686  | 605.3605  |
|   | 644.8658  | 654.1261  | 692.5981  |
|   | 771.7631  | 827.2382  | 1004.8744 |
|   | 1006.7381 | 1050.0498 | 1076.6085 |
|   | 1117.2000 | 1332.9957 | 1399.6188 |
|   | 1408.2160 | 1487.6970 | 1529.9979 |

|           |           |           |
|-----------|-----------|-----------|
| 1595.9772 | 1785.1313 | 2364.6107 |
| 2503.9774 | 3184.2863 | 3304.2955 |

E = -493.000331170 a.u.

**(24) •CH<sub>2</sub>CO<sub>2</sub><sup>-</sup>/H<sub>2</sub>PO<sub>4</sub><sup>-</sup>**

|   |           |           |           |
|---|-----------|-----------|-----------|
| O | 1.730367  | 1.123486  | -0.123992 |
| H | 4.291494  | 0.935409  | 0.242376  |
| C | 2.303769  | -0.000021 | -0.041683 |
| C | 3.756849  | 0.000086  | 0.166440  |
| O | 1.730485  | -1.123585 | -0.123945 |
| H | 4.291696  | -0.935137 | 0.242172  |
| H | 0.129198  | -1.213098 | -0.386710 |
| O | -0.852872 | -1.259976 | -0.575282 |
| O | -3.020828 | 0.000098  | -0.408251 |
| P | -1.610246 | -0.000041 | 0.092214  |
| O | -1.365455 | -0.000843 | 1.574924  |
| O | -0.853125 | 1.260756  | -0.573922 |
| H | 0.129026  | 1.213575  | -0.385846 |

|           |           |           |
|-----------|-----------|-----------|
| 38.6776   | 41.8260   | 99.4640   |
| 118.8797  | 149.9770  | 192.3800  |
| 252.5086  | 365.3973  | 371.3145  |
| 472.8667  | 494.7324  | 497.5520  |
| 508.7030  | 586.9579  | 665.8968  |
| 770.1825  | 838.8291  | 861.4995  |
| 864.8806  | 909.2283  | 997.6414  |
| 1004.3205 | 1083.8852 | 1205.2038 |
| 1306.8668 | 1373.0665 | 1402.7780 |
| 1477.1953 | 1561.4267 | 2988.0373 |
| 3051.8649 | 3175.9725 | 3293.5129 |

E = -871.715452531 a.u.

**(25) EtOH**

|   |           |           |           |
|---|-----------|-----------|-----------|
| H | -1.288567 | -0.854827 | -0.885930 |
| H | 1.983685  | 0.085327  | -0.000751 |
| C | -1.220240 | -0.221976 | -0.000057 |
| O | 1.150631  | -0.395866 | 0.000109  |
| H | -1.288602 | -0.854951 | 0.885745  |
| C | 0.081116  | 0.547266  | 0.000045  |
| H | -2.066081 | 0.466245  | -0.000007 |
| H | 0.144741  | 1.186722  | -0.885298 |
| H | 0.144519  | 1.186674  | 0.885450  |

|           |           |           |
|-----------|-----------|-----------|
| 210.3177  | 269.2318  | 423.6622  |
| 820.1779  | 912.1185  | 1048.9847 |
| 1117.8955 | 1181.7489 | 1267.6676 |
| 1307.6402 | 1399.2185 | 1455.8293 |
| 1479.1623 | 1491.5774 | 1528.5129 |
| 3040.6437 | 3065.1999 | 3075.5711 |
| 3140.5134 | 3143.6191 | 3888.6957 |

E = -155.021823243 a.u.

**(26) TS1 ( $\bullet\text{CH}_2\text{CO}_2\text{H} + \text{EtOH}$ )**

|   |           |           |           |
|---|-----------|-----------|-----------|
| O | -0.974734 | -0.833026 | -1.050645 |
| H | -0.566035 | -1.495791 | 1.475603  |
| C | -1.336799 | -0.221189 | -0.061061 |
| C | -0.796046 | -0.456521 | 1.271699  |
| O | -2.212092 | 0.789067  | -0.227414 |
| H | -1.202980 | 0.109124  | 2.101624  |
| H | 1.389155  | 2.226582  | 0.354461  |
| C | 1.555739  | 1.382370  | -0.314906 |
| H | 0.725439  | 1.326388  | -1.022753 |
| H | 2.472859  | 1.561874  | -0.882285 |
| C | 1.677190  | 0.107054  | 0.472663  |
| H | 2.412342  | 0.119265  | 1.275038  |
| H | 0.517422  | -0.017978 | 1.081238  |
| O | 1.815982  | -1.052658 | -0.263986 |
| H | 1.065806  | -1.111927 | -0.877836 |
| H | -2.447755 | 1.185112  | 0.620899  |

|            |           |           |
|------------|-----------|-----------|
| -1407.3314 | 58.2953   | 92.8976   |
| 133.6146   | 149.0826  | 209.6555  |
| 258.3062   | 436.0372  | 446.9307  |
| 477.4757   | 490.8099  | 535.6527  |
| 622.2696   | 659.3353  | 714.0555  |
| 858.2458   | 920.2448  | 942.4157  |
| 1025.4883  | 1037.0640 | 1092.6941 |
| 1137.8070  | 1175.5052 | 1240.4226 |
| 1322.1648  | 1339.5284 | 1370.2117 |
| 1396.4156  | 1437.3066 | 1446.9948 |
| 1471.7945  | 1476.1444 | 1485.3601 |
| 1734.8559  | 3050.0756 | 3115.4198 |
| 3138.3388  | 3148.7008 | 3153.1943 |
| 3249.7659  | 3738.6348 | 3855.8264 |

E = -383.417359879 a.u.

**(27) TS2 ( $\bullet\text{CH}_2\text{CO}_2\text{H} + \text{EtOH}$ )**

|   |           |           |           |
|---|-----------|-----------|-----------|
| O | -1.072694 | -0.888792 | -0.923356 |
| H | -0.633573 | -1.412618 | 1.528180  |
| C | -1.453735 | -0.045217 | 0.071774  |
| C | -0.803417 | -0.359552 | 1.333549  |
| O | -2.194637 | 0.888885  | -0.149245 |
| H | -1.120601 | 0.244687  | 2.173226  |
| H | 1.343901  | 2.218374  | 0.227920  |
| C | 1.546259  | 1.347154  | -0.395393 |
| H | 0.730405  | 1.238331  | -1.114565 |
| H | 2.469529  | 1.522757  | -0.953667 |
| C | 1.677889  | 0.116014  | 0.457319  |
| H | 2.397914  | 0.183745  | 1.270352  |

|   |           |           |           |
|---|-----------|-----------|-----------|
| H | 0.516831  | 0.001625  | 1.056123  |
| O | 1.868803  | -1.074621 | -0.220068 |
| H | 1.197760  | -1.146704 | -0.913032 |
| H | -1.515918 | -0.604371 | -1.736682 |

|            |           |           |
|------------|-----------|-----------|
| -1416.1100 | 65.7859   | 85.1627   |
| 120.1858   | 139.7377  | 207.8856  |
| 250.5974   | 417.2969  | 431.6434  |
| 446.5264   | 520.4099  | 567.8791  |
| 600.1018   | 665.9309  | 710.7270  |
| 860.5693   | 919.3417  | 926.2680  |
| 1021.8063  | 1037.3106 | 1082.9970 |
| 1140.3275  | 1169.3272 | 1210.5273 |
| 1312.9425  | 1347.6735 | 1381.6659 |
| 1397.3588  | 1422.4458 | 1439.4348 |
| 1454.2715  | 1473.8928 | 1483.2256 |
| 1760.5282  | 3049.0659 | 3112.8394 |
| 3139.7126  | 3148.9152 | 3158.8697 |
| 3262.3386  | 3807.5302 | 3813.1233 |

E = -383.419978377 a.u.

**(28) TS3 ( $\bullet\text{CH}_2\text{CO}_2\text{H} + \text{EtOH}$ )**

|   |           |           |           |
|---|-----------|-----------|-----------|
| O | -1.022943 | -0.693930 | -1.067035 |
| H | -0.641718 | -1.343259 | 1.501436  |
| C | -1.510426 | -0.037646 | 0.006126  |
| C | -0.836720 | -0.297029 | 1.283192  |
| O | -2.433702 | 0.731383  | -0.146828 |
| H | -1.204712 | 0.291288  | 2.114111  |
| H | 1.576701  | 2.235248  | 0.274070  |
| C | 1.697233  | 1.354157  | -0.355456 |
| H | 0.891883  | 1.335060  | -1.092542 |
| H | 2.647772  | 1.432044  | -0.889087 |
| C | 1.669059  | 0.114569  | 0.484815  |
| H | 2.374106  | 0.083692  | 1.314640  |
| H | 0.488784  | 0.088977  | 1.046334  |
| O | 1.700454  | -1.037937 | -0.305263 |
| H | 1.980583  | -1.792931 | 0.225096  |
| H | -0.178757 | -1.130552 | -0.853108 |

|            |           |           |
|------------|-----------|-----------|
| -1509.1863 | 67.3568   | 92.3721   |
| 144.3888   | 165.8981  | 206.6777  |
| 256.2262   | 413.5921  | 427.6598  |
| 448.8736   | 521.8005  | 615.6560  |
| 645.8794   | 660.7213  | 699.4740  |
| 865.4015   | 926.9476  | 932.5325  |
| 1040.8927  | 1047.6024 | 1069.8552 |
| 1151.8516  | 1163.9342 | 1263.3326 |
| 1281.1606  | 1356.6236 | 1372.3411 |
| 1394.9282  | 1433.7440 | 1450.3715 |
| 1469.9498  | 1471.3500 | 1491.9872 |
| 1776.6356  | 3055.5062 | 3117.4158 |
| 3128.8096  | 3140.3829 | 3154.0867 |
| 3244.0289  | 3677.3807 | 3864.7888 |

E = -383.418524723 a.u.

**(29) TS4 ( $\bullet\text{CH}_2\text{CO}_2\text{H} + \text{EtOH}$ )**

|   |           |           |           |
|---|-----------|-----------|-----------|
| O | -1.020134 | -0.730135 | -1.088419 |
| H | -0.541609 | -1.618268 | 1.374269  |
| C | -1.337000 | -0.211802 | -0.028576 |
| C | -0.770048 | -0.564987 | 1.261636  |
| O | -2.193496 | 0.823348  | 0.010716  |
| H | -1.168570 | -0.057458 | 2.130548  |
| H | 1.405190  | 2.180701  | 0.535641  |
| C | 1.559463  | 1.399538  | -0.208957 |
| H | 0.718826  | 1.409113  | -0.906713 |
| H | 2.468358  | 1.627854  | -0.772067 |
| C | 1.687392  | 0.058135  | 0.458368  |
| H | 2.440241  | -0.006635 | 1.241534  |
| H | 0.538300  | -0.116640 | 1.079716  |
| O | 1.802419  | -1.031133 | -0.383623 |
| H | 1.041746  | -1.029667 | -0.986799 |
| H | -2.451642 | 1.029050  | -0.900346 |

|            |           |           |
|------------|-----------|-----------|
| -1417.6438 | 64.9021   | 92.2099   |
| 134.4754   | 152.6416  | 210.0712  |
| 257.2357   | 432.7727  | 435.4342  |
| 480.5355   | 527.7965  | 565.3676  |
| 600.2193   | 665.6032  | 724.2973  |
| 860.0718   | 920.0915  | 944.8010  |
| 1021.9660  | 1035.0769 | 1092.7301 |
| 1138.1443  | 1170.9305 | 1221.3737 |
| 1323.5482  | 1369.7467 | 1377.1899 |
| 1396.7266  | 1437.3634 | 1448.0914 |
| 1465.6965  | 1475.0364 | 1485.5784 |
| 1717.2344  | 3049.9310 | 3114.6239 |
| 3138.5043  | 3148.6941 | 3162.2577 |
| 3263.3347  | 3741.4166 | 3807.6382 |

E = -383.420578843 a.u.

**(30) TS ( $\bullet\text{CH}_2\text{CO}_2^- + \text{EtOH}$ )**

|   |           |           |           |
|---|-----------|-----------|-----------|
| O | 0.947371  | -0.931115 | 0.859880  |
| H | 0.744906  | -1.034279 | -1.790706 |
| C | 1.427608  | -0.069494 | 0.051962  |
| C | 0.845278  | -0.055612 | -1.327944 |
| O | 2.307170  | 0.767779  | 0.344767  |
| H | 1.202796  | 0.727093  | -1.989261 |
| H | -1.748538 | 2.189306  | -0.093440 |
| C | -1.708051 | 1.257709  | 0.473481  |
| H | -0.819039 | 1.273595  | 1.108706  |
| H | -2.588341 | 1.207380  | 1.121400  |
| C | -1.662589 | 0.071986  | -0.456026 |
| H | -2.439449 | 0.064353  | -1.221170 |
| H | -0.512082 | 0.184932  | -1.085779 |

|   |           |           |          |
|---|-----------|-----------|----------|
| O | -1.579524 | -1.164992 | 0.166042 |
| H | -0.653870 | -1.213288 | 0.535901 |

|            |           |           |
|------------|-----------|-----------|
| -1590.6039 | 64.7829   | 90.2048   |
| 152.9827   | 186.1189  | 218.3839  |
| 274.4286   | 434.7441  | 440.3568  |
| 521.2979   | 621.6185  | 658.5546  |
| 713.9328   | 836.3796  | 858.9590  |
| 920.5532   | 953.4948  | 1024.4394 |
| 1033.9309  | 1107.4365 | 1132.2681 |
| 1171.1675  | 1339.2561 | 1369.0145 |
| 1385.9470  | 1399.3016 | 1441.8152 |
| 1464.1909  | 1471.3306 | 1492.1751 |
| 1511.8243  | 1604.7729 | 3039.1861 |
| 3076.2054  | 3105.4903 | 3118.7243 |
| 3123.1436  | 3134.0723 | 3215.3739 |

E = -382.956780582 a.u.

**(31) TS ( $\bullet\text{CH}_2\text{CO}_2^-/\text{H}_2\text{CO}_3 + \text{EtOH}$ )**

|   |           |           |           |
|---|-----------|-----------|-----------|
| O | -0.287105 | 0.302773  | -1.056211 |
| H | -2.448034 | 1.775226  | -1.203256 |
| C | -0.602830 | 1.207692  | -0.213397 |
| C | -1.995497 | 1.685437  | -0.221105 |
| O | 0.200853  | 1.641037  | 0.654604  |
| H | -2.234310 | 2.469423  | 0.487528  |
| H | -2.363157 | -0.790557 | 2.339494  |
| C | -2.081266 | -1.268945 | 1.400730  |
| H | -1.024724 | -1.066234 | 1.208577  |
| H | -2.204706 | -2.350131 | 1.509722  |
| C | -2.935010 | -0.755343 | 0.272196  |
| H | -4.009180 | -0.819061 | 0.438754  |
| H | -2.657007 | 0.533607  | 0.200599  |
| O | -2.625139 | -1.247885 | -0.986082 |
| H | -1.721207 | -0.944778 | -1.193315 |
| O | 2.295547  | 0.311511  | 1.015346  |
| O | 3.914272  | -0.882797 | 0.097448  |
| C | 2.819736  | -0.361767 | 0.007178  |
| H | 1.428339  | 0.832650  | 0.796828  |
| O | 2.109559  | -0.447349 | -1.103800 |
| H | 1.139286  | -0.100924 | -1.028988 |

|            |           |           |
|------------|-----------|-----------|
| -1519.3025 | 25.8502   | 29.4428   |
| 70.8453    | 81.9350   | 115.2906  |
| 138.6423   | 163.0902  | 184.7399  |
| 193.6497   | 220.1094  | 256.5891  |
| 294.9344   | 437.9511  | 473.3175  |
| 525.9204   | 584.6220  | 646.5664  |
| 650.8540   | 659.0433  | 695.7901  |
| 724.5497   | 826.3000  | 865.1506  |
| 921.8129   | 981.6237  | 1028.1431 |
| 1036.5218  | 1046.9609 | 1077.0646 |
| 1100.8629  | 1109.7646 | 1130.0204 |
| 1170.5889  | 1328.7180 | 1334.4632 |

|           |           |           |
|-----------|-----------|-----------|
| 1377.4442 | 1389.2074 | 1401.7399 |
| 1411.0637 | 1448.0701 | 1457.3953 |
| 1472.1846 | 1477.2668 | 1487.7927 |
| 1526.0908 | 1590.5810 | 1789.1023 |
| 2417.6419 | 2553.3068 | 3045.7154 |
| 3110.0207 | 3129.8256 | 3141.9740 |
| 3145.6879 | 3244.0651 | 3635.6548 |

E = -648.008525540 a.u.

**(32) TS ( $\bullet\text{CH}_2\text{CO}_2^-/\text{H}_2\text{PO}_4^- + \text{EtOH}$ )**

|   |           |           |           |
|---|-----------|-----------|-----------|
| O | 0.875247  | 0.693097  | 1.083847  |
| H | 3.222373  | 1.814700  | 0.746193  |
| C | 1.199752  | 1.380840  | 0.060555  |
| C | 2.649917  | 1.611089  | -0.153804 |
| O | 0.384131  | 1.815348  | -0.790230 |
| H | 2.916538  | 2.202153  | -1.022733 |
| H | 2.440626  | -1.352506 | -2.181287 |
| C | 2.180779  | -1.595356 | -1.149486 |
| H | 1.173670  | -1.223867 | -0.941530 |
| H | 2.165438  | -2.684787 | -1.045732 |
| C | 3.183183  | -0.994152 | -0.200250 |
| H | 4.221972  | -1.255161 | -0.400169 |
| H | 3.092861  | 0.309954  | -0.384887 |
| O | 2.903243  | -1.165214 | 1.148918  |
| H | 2.097669  | -0.635811 | 1.329503  |
| H | -1.195795 | 1.376640  | -0.759352 |
| O | -2.159337 | 1.117920  | -0.727394 |
| O | -3.791173 | -0.543126 | 0.213325  |
| P | -2.329681 | -0.325906 | -0.023380 |
| O | -1.555197 | -1.353687 | -0.797725 |
| O | -1.630344 | -0.098115 | 1.415839  |
| H | -0.684477 | 0.192966  | 1.295961  |

|            |           |           |
|------------|-----------|-----------|
| -1552.6857 | 24.7632   | 45.8283   |
| 68.7184    | 79.9606   | 107.9765  |
| 114.5375   | 143.7867  | 163.6756  |
| 179.0400   | 197.6183  | 249.3864  |
| 277.2395   | 367.0966  | 367.9932  |
| 442.6211   | 464.2653  | 494.6757  |
| 498.4445   | 506.6714  | 524.6073  |
| 620.1118   | 657.3289  | 691.1006  |
| 720.3645   | 833.7750  | 839.2026  |
| 858.5851   | 861.5703  | 891.1929  |
| 922.0029   | 975.1652  | 1027.3991 |
| 1037.2828  | 1085.2885 | 1105.2041 |
| 1128.6132  | 1167.3263 | 1207.6521 |
| 1291.0223  | 1336.7942 | 1366.2568 |
| 1382.1612  | 1394.1558 | 1403.0529 |
| 1454.4715  | 1457.7026 | 1469.8497 |
| 1483.4080  | 1492.3857 | 1571.9034 |
| 3034.3460  | 3065.9988 | 3099.0512 |
| 3118.3233  | 3126.9315 | 3133.2486 |
| 3138.0376  | 3233.1376 | 3511.1172 |

E = -1026.72434473 a.u.

**(33) CH<sub>3</sub>CO<sub>2</sub>H**

|   |           |           |           |
|---|-----------|-----------|-----------|
| O | -0.789961 | -1.023224 | 0.000005  |
| H | 1.656775  | -0.708647 | -0.880396 |
| C | -0.088298 | 0.120597  | -0.000003 |
| C | 1.388030  | -0.124854 | -0.000003 |
| O | -0.622148 | 1.200717  | 0.000001  |
| H | 1.917818  | 0.822175  | 0.000061  |
| H | -1.732851 | -0.799205 | -0.000024 |
| H | 1.656743  | -0.708728 | 0.880349  |

|           |           |           |
|-----------|-----------|-----------|
| 77.0657   | 435.5386  | 539.8086  |
| 595.5013  | 644.2905  | 889.6324  |
| 1012.2182 | 1073.1015 | 1223.1153 |
| 1351.3358 | 1420.2593 | 1462.9675 |
| 1468.7051 | 1818.8027 | 3088.5154 |
| 3156.9560 | 3203.8626 | 3805.5489 |

E = -229.078175796 a.u.

**(34) CH<sub>3</sub>CO<sub>2</sub><sup>-</sup>**

|   |           |           |           |
|---|-----------|-----------|-----------|
| O | 0.750716  | 1.122454  | -0.039036 |
| H | -1.744098 | 0.864903  | -0.520859 |
| C | 0.187588  | 0.001205  | -0.010030 |
| C | -1.344932 | -0.007032 | -0.005049 |
| O | 0.763079  | -1.112853 | 0.043162  |
| H | -1.734379 | -0.919602 | -0.453598 |
| H | -1.686139 | 0.030270  | 1.032526  |

|           |           |           |
|-----------|-----------|-----------|
| 52.5289   | 456.9530  | 612.7254  |
| 653.6408  | 922.6435  | 1019.2795 |
| 1054.4046 | 1352.8507 | 1431.4307 |
| 1458.8273 | 1480.1906 | 1603.9752 |
| 3064.8192 | 3134.4686 | 3161.9266 |

E = -228.610958384 a.u.

**(35) CH<sub>3</sub>CO<sub>2</sub><sup>-</sup>/H<sub>2</sub>CO<sub>3</sub>**

|   |           |           |           |
|---|-----------|-----------|-----------|
| O | -1.169102 | -1.108195 | -0.036711 |
| H | -3.664905 | -0.862755 | -0.516369 |
| C | -1.762104 | 0.002288  | -0.016538 |
| C | -3.272357 | -0.002088 | 0.020612  |
| O | -1.170143 | 1.112799  | 0.000529  |
| H | -3.671589 | 0.922223  | -0.389887 |
| H | -3.586115 | -0.080445 | 1.063712  |
| O | 1.333265  | 1.130177  | -0.018613 |
| O | 3.230673  | -0.001406 | 0.013436  |
| C | 2.013916  | -0.000828 | 0.004423  |



|   |          |           |           |
|---|----------|-----------|-----------|
| H | 0.300051 | 1.040230  | -0.010433 |
| O | 1.331351 | -1.130451 | 0.017353  |
| H | 0.297479 | -1.038876 | -0.005970 |

|           |           |           |
|-----------|-----------|-----------|
| 8.3062    | 26.7662   | 57.6981   |
| 121.1097  | 159.2893  | 180.4720  |
| 276.2591  | 494.3784  | 616.2847  |
| 645.7948  | 654.7626  | 688.5234  |
| 826.8809  | 955.7158  | 1033.6067 |
| 1054.4736 | 1067.3251 | 1068.6110 |
| 1121.5958 | 1333.6244 | 1371.5168 |
| 1404.6420 | 1459.8276 | 1465.2339 |
| 1494.5998 | 1528.9192 | 1616.1721 |
| 1785.2790 | 2369.7181 | 2503.1262 |
| 3077.8581 | 3150.9820 | 3184.5239 |

E = -493.664712087 a.u.

**(36) CH<sub>3</sub>CO<sub>2</sub><sup>-</sup>/H<sub>2</sub>PO<sub>4</sub><sup>-</sup>**

|   |           |           |           |
|---|-----------|-----------|-----------|
| O | -1.678039 | -1.117519 | -0.154711 |
| H | -4.210496 | -0.893668 | -0.223513 |
| C | -2.248654 | 0.000047  | -0.069905 |
| C | -3.746410 | 0.000157  | 0.188179  |
| O | -1.677650 | 1.117362  | -0.154628 |
| H | -4.210443 | 0.894426  | -0.222602 |
| H | -3.906498 | -0.000489 | 1.268769  |
| H | -0.076223 | 1.209983  | -0.400320 |
| O | 0.908726  | 1.259756  | -0.576395 |
| O | 3.075502  | -0.000227 | -0.391751 |
| P | 1.660781  | 0.000068  | 0.097208  |
| O | 1.404880  | 0.001075  | 1.578165  |
| O | 0.908880  | -1.260674 | -0.574587 |
| H | -0.076058 | -1.210677 | -0.398849 |

|           |           |           |
|-----------|-----------|-----------|
| 40.3244   | 48.2663   | 53.2168   |
| 100.9835  | 119.6913  | 156.6075  |
| 191.8681  | 364.9336  | 371.5046  |
| 488.0821  | 494.4203  | 498.3437  |
| 508.7954  | 615.6512  | 664.8675  |
| 838.9214  | 861.7435  | 866.8035  |
| 903.4670  | 953.7192  | 1033.5241 |
| 1064.2616 | 1083.5853 | 1204.9055 |
| 1308.9586 | 1365.9677 | 1392.0746 |
| 1456.3927 | 1458.5796 | 1487.2720 |
| 1586.9714 | 2978.2664 | 3039.7698 |
| 3073.0604 | 3144.4577 | 3174.9328 |

E = -872.379704772 a.u.

**Table S1.** TST and CVT rate constants ( $s^{-1}$ ), and Wigner (WTC) and small-curvature tunnelling (SCT) corrections for the unimolecular PCET reactions in the buffered solutions.<sup>a</sup> The pre-reaction H-bonded complex between  $\bullet\text{CH}(\text{CH}_3)\text{OH}\cdots\text{HCO}_3^-$  (or  $\text{HPO}_4^{2-}$ ; structures 37 and 38) and bromoacetate is taken as the reactant. The PCM-M06-2X-D3/6-311+G(2d,p) level of theory is used.

|         | $\text{HCO}_3^-$   | $\text{HPO}_4^{2-}$   |
|---------|--------------------|-----------------------|
| TST     | $2.58 \times 10^8$ | $1.23 \times 10^{12}$ |
| CVT     | $2.58 \times 10^8$ | $1.15 \times 10^{12}$ |
| CVT/TST | 1.00               | 0.93                  |
| WTC     | 1.15               | 1.10                  |
| SCT     | 1.64               | 1.28                  |

<sup>a</sup> The reactions paths were interpolated in the steps of 0.05 bohr starting from the PCET transition states (structures 11 and 12). The number of points along the MEP was 10 (9) and 5 (4) in the forward and reverse direction, respectively, for the  $\text{HCO}_3^-$  ( $\text{HPO}_4^{2-}$ ) case.

**(37)  $\bullet\text{CH}(\text{CH}_3)\text{OH}\cdots\text{HCO}_3^- + \text{BrAc}^-$**

|          |           |           |           |
|----------|-----------|-----------|-----------|
| H        | 2.853684  | 1.214536  | 2.380442  |
| H        | 2.478605  | 1.059567  | -0.447211 |
| C        | 1.831215  | 1.069628  | 2.003472  |
| O        | 2.202292  | 1.999356  | -0.238017 |
| H        | 1.144102  | 1.194574  | 2.841472  |
| C        | 1.498572  | 2.036361  | 0.916992  |
| H        | 1.760732  | 0.034574  | 1.656450  |
| H        | 1.164927  | 3.034907  | 1.177042  |
| O        | 1.254582  | -1.608844 | -0.358535 |
| H        | 0.825227  | -0.851082 | -0.848614 |
| C        | 2.607113  | -1.458304 | -0.304048 |
| O        | 3.240950  | -2.389201 | 0.212949  |
| O        | 3.087717  | -0.387128 | -0.777348 |
| O        | -1.409177 | 2.029061  | -1.335882 |
| H        | -1.502576 | 1.295985  | 1.106045  |
| Br       | -2.788889 | -0.700761 | 0.335320  |
| C        | -1.207762 | 0.485153  | 0.450342  |
| C        | -0.874020 | 0.971860  | -0.966138 |
| H        | -0.428219 | -0.131525 | 0.882169  |
| O        | -0.103375 | 0.237621  | -1.639131 |
|          |           |           |           |
| 28.5355  | 48.7349   | 58.9601   |           |
| 67.0651  | 80.0248   | 89.2618   |           |
| 99.8251  | 114.5589  | 121.3986  |           |
| 141.7045 | 166.0459  | 178.2263  |           |

|           |           |           |
|-----------|-----------|-----------|
| 192.7500  | 220.9518  | 244.2736  |
| 449.0842  | 451.1329  | 520.6049  |
| 605.4281  | 639.4800  | 673.5875  |
| 685.6915  | 817.9207  | 853.3965  |
| 902.0611  | 928.7264  | 930.1955  |
| 942.1994  | 1014.8748 | 1027.2593 |
| 1034.9013 | 1109.0925 | 1132.0569 |
| 1228.3797 | 1253.5120 | 1347.5599 |
| 1359.8302 | 1380.7386 | 1412.7957 |
| 1416.9792 | 1461.6275 | 1473.3368 |
| 1486.5646 | 1525.7313 | 1654.8211 |
| 1667.3785 | 2988.3537 | 3001.6620 |
| 3075.8403 | 3077.2057 | 3129.1544 |
| 3154.9553 | 3176.4862 | 3237.9107 |

E = -3221.13686209 a.u.

**(38) •CH(CH<sub>3</sub>)OH...HPO<sub>4</sub><sup>2-</sup> + BrAc<sup>-</sup>**

|    |           |           |           |
|----|-----------|-----------|-----------|
| O  | 1.976647  | 1.947065  | 1.381827  |
| H  | 1.653085  | 1.215288  | -1.027361 |
| C  | 1.298026  | 0.939465  | 1.110188  |
| C  | 1.340906  | 0.438826  | -0.337708 |
| Br | 2.751130  | -0.953912 | -0.463993 |
| O  | 0.584882  | 0.275142  | 1.906518  |
| H  | 0.426052  | -0.058164 | -0.653412 |
| H  | -1.523164 | 4.279899  | -1.585574 |
| H  | -0.475230 | 4.297745  | -0.168737 |
| C  | -0.740167 | 3.715139  | -1.056889 |
| H  | 0.134285  | 3.672870  | -1.708243 |
| C  | -1.183028 | 2.344913  | -0.682739 |
| O  | -2.192907 | 2.264574  | 0.206985  |
| H  | -1.089591 | 1.514247  | -1.377202 |
| O  | -1.442116 | -0.965409 | -1.371644 |
| O  | -2.884072 | -0.089554 | 0.532982  |
| H  | -2.463425 | 1.254057  | 0.321704  |
| P  | -2.164591 | -1.315790 | -0.080467 |
| H  | -0.449658 | -0.974737 | 1.276606  |
| O  | -1.016582 | -1.738226 | 1.019551  |
| O  | -3.066782 | -2.532030 | -0.154737 |

|           |           |           |
|-----------|-----------|-----------|
| 30.0144   | 48.5642   | 51.8458   |
| 66.1431   | 80.6158   | 86.8149   |
| 93.3078   | 118.4517  | 126.8646  |
| 133.8321  | 137.4822  | 163.7121  |
| 183.2321  | 230.9320  | 235.4368  |
| 365.3480  | 397.5062  | 447.9535  |
| 459.2856  | 509.9758  | 512.3453  |
| 521.8646  | 553.4786  | 624.1820  |
| 671.2464  | 790.6488  | 807.4610  |
| 821.4663  | 936.3645  | 942.0867  |
| 947.4117  | 953.6607  | 1013.6331 |
| 1046.0118 | 1115.7349 | 1124.9161 |
| 1142.6598 | 1164.7966 | 1233.9049 |
| 1262.0897 | 1267.1823 | 1379.4088 |

|           |           |           |
|-----------|-----------|-----------|
| 1419.6967 | 1425.3208 | 1455.8748 |
| 1482.3498 | 1490.9320 | 1600.7968 |
| 1636.9763 | 2170.4590 | 2970.9935 |
| 3051.6969 | 3105.7949 | 3119.5874 |
| 3151.8795 | 3209.1151 | 3368.5939 |

$E = -3599.84064836$  a.u.
